# Supplementary material for: Monoamine Oxidase Inhibition by Major Tanshinones from Salvia miltiorrhiza and Selective Muscarinic Acetylcholine M4 Receptor Antagonism by Tanshinone I
Source: MDPI journal article supplement (doi:10.3390/biom11071001), 2021-07-08
Supplement: s1 [file s1]

# SUPPLEMENTARY INFORMATION

Article

## Monoamine Oxidase Inhibition by Major Tanshinones from *Salvia miltiorrhiza* and Selective Muscarinic Acetylcholine M<sub>4</sub> Receptor Antagonism by Tanshinone I

Ritu Prajapati <sup>1</sup>, Se Eun Park <sup>1,2</sup>, Su Hui Seong <sup>1,3</sup>, Pradeep Paudel <sup>1,4</sup>, Fazlin Mohd Fauzi <sup>5</sup>, Hyun Ah Jung <sup>6,\*</sup> and Jae Sue Choi <sup>1,\*</sup>

<sup>1</sup> Department of Food and Life Science, Pukyong National University, Busan 48513, Korea; ritpraz@gmail.com (R.P.), gogo1685@mail.ulsan.ac.kr (S.E.P.); shseong@hnibr.re.kr (S.H.S.); ppradeep@olemiss.edu (P.P.)

<sup>2</sup> Department of Biomedical Science, Asan Medical Institute of Convergence Science and Technology, University of Ulsan, Seoul 05505, Korea

<sup>3</sup> Natural Product Research Division, Honam National Institute of Biological Resource, Mokpo 58762, Korea

<sup>4</sup> National Center for Natural Products Research, Research Institute of Pharmaceutical Science, The University of Mississippi, Oxford, MS 38677, USA

<sup>5</sup> Department of Pharmacology and Chemistry, Faculty of Pharmacy, Universiti Teknologi MARA, Selangor 42300, Malaysia; fazlin5465@uitm.edu.my

<sup>6</sup> Department of Food Science and Human Nutrition, Jeonbuk National University, Jeonju 54896, Korea

\* Correspondence: choijs@pknu.ac.kr (J.S.C.); jungha@jbnu.ac.kr (H.A.J.); Tel.: +82-51-629-7547 (J.S.C.); +82-63-270-4882 (H.A.J.)

Contents

Table S1..... 3

Table S2..... 8

Table S3..... Error! Bookmark not defined.

References..... 9

**Table S1.** In vitro pharmacology: Cellular and nuclear receptor functional assays.

| Assay                                  | Source                       | Stimulus                                       | Incubation      | Measured Component                | Detection Method | References |
|----------------------------------------|------------------------------|------------------------------------------------|-----------------|-----------------------------------|------------------|------------|
| M <sub>1</sub> (h) (agonist effect)    | Human re-combinant CHO cells | None (100 nM acetylcholine for control)        | RT              | Intracellular [Ca <sup>2+</sup> ] | Fluorimetry      | [33]       |
| M <sub>1</sub> (h) (antagonist effect) | Human re-combinant CHO cells | Acetylcholine (10 nM)                          | RT              | Intracellular [Ca <sup>2+</sup> ] | Fluorimetry      | [33]       |
| M <sub>2</sub> (h) (agonist effect)    | Human re-combinant CHO cells | None (3 $\mu$ M acetylcholine for control)     | 10 min<br>37 °C | cAMP                              | HTRF             | [34]       |
| M <sub>2</sub> (h) (antagonist effect) | Human re-combinant CHO cells | Acetylcholine (300 nM)                         | 10 min<br>37 °C | cAMP                              | HTRF             | [34]       |
| M <sub>3</sub> (h) (agonist effect)    | Human re-combinant CHO cells | None (1 $\mu$ M acetylcholine for control)     | RT              | Intracellular [Ca <sup>2+</sup> ] | Fluorimetry      | [33]       |
| M <sub>3</sub> (h) (antagonist effect) | Human re-combinant CHO cells | Acetylcholine (100 nM)                         | RT              | Intracellular [Ca <sup>2+</sup> ] | Fluorimetry      | [33]       |
| M <sub>4</sub> (h) (agonist effect)    | Human re-combinant CHO cells | None (1 $\mu$ M acetylcholine for control)     | 10 min<br>37 °C | cAMP                              | HTRF             | [35]       |
| M <sub>4</sub> (h) (antagonist effect) | Human re-combinant CHO cells | Acetylcholine (100 nM)                         | 10 min<br>37 °C | cAMP                              | HTRF             | [35]       |
| M <sub>5</sub> (h) (agonist effect)    | Human re-combinant RBL cells | None (0.624 $\mu$ M acetylcholine for control) | RT              | Intracellular [Ca <sup>2+</sup> ] | Fluorimetry      | [36]       |
| M <sub>5</sub> (h) (antagonist effect) | Human re-combinant RBL cells | Acetylcholine (10 nM)                          | RT              | Intracellular [Ca <sup>2+</sup> ] | Fluorimetry      | [36]       |

HTRF: homogeneous time-resolved fluorescence; RT: room temperature

**Table S2.** Binding site residues and docking scores of tanshinone I, tanshinone IIA, cryptotanshinone and the reference ligands in human monoamine oxidases (hMAO-A and hMAO-B).

| Ligand                                  | Binding Energy<br>(kcal/mol) <sup>a</sup> | Interacting residue <sup>b</sup> |                                                                                                                                                        |                  |
|-----------------------------------------|-------------------------------------------|----------------------------------|--------------------------------------------------------------------------------------------------------------------------------------------------------|------------------|
|                                         |                                           | H-bond                           | Hydrophobic                                                                                                                                            | Electrostatic    |
| hMAO-A                                  |                                           |                                  |                                                                                                                                                        |                  |
| Tanshinone I<br>(catalytic inhibitor)   | -10.06                                    | FAD600                           | Pi-sigma: Ile335, Tyr407, FAD600, Phe208<br>Pi-Pi Stacked: Tyr407, FAD600, Ile335<br>Alky: Ile335<br>Pi-Alkyl: Tyr444, FAD600, Ile180, Ile35, Leu337   | –                |
| Tanshinone I<br>(allosteric inhibitor)  | -7.87                                     | Thr205                           | Pi-sigma: His488<br>Pi-Pi T-shaped: Phe112, Trp128<br>Alkyl: Arg129<br>Pi-Alkyl: Tyr121, Tyr124, Arg129                                                | Pi-Anion: Glu492 |
| Tanshinone IIA<br>(catalytic inhibitor) | -9.91                                     | –                                | Pi-sigma: Ile335, Tyr407<br>Pi-Pi T-shaped: Phe208<br>Alkyl: Cys323, Ile335, Ile325<br>Pi-Alkyl: Tyr69, Phe208, Phe352, FAD600, Leu337, Ile180, Ile335 | –                |

|                                            |        |        |                                                                                                                                        |                  |
|--------------------------------------------|--------|--------|----------------------------------------------------------------------------------------------------------------------------------------|------------------|
| Tanshinone IIA<br>(allosteric inhibitor)   | -7.3   | Thr205 | Pi-sigma: His488<br>Pi-Pi T-shaped: Phe112, Tyr124, Trp128<br>Alkyl: Arg129<br>Pi-Alkyl: Tyr121, Tyr124, Arg129                        | Pi-Anion: Glu492 |
| Cryptotanshinone<br>(catalytic inhibitor)  | -10.07 | –      | Pi-sigma: Tyr407<br>Pi-Pi T-shaped: Phe208<br>Alkyl: Val210, Cys323, Leu337<br>Pi-Alkyl: Tyr69, Phe352, Tyr407, FAD600, Ile180, Ile335 | –                |
| Cryptotanshinone<br>(allosteric inhibitor) | -8.67  | His488 | Pi-Pi T-shaped: Phe112, Trp128<br>Alkyl: Val115<br>Pi-Alkyl: Tyr121, Tyr124, His488                                                    | Pi-Anion: Glu492 |
| HRM <sup>c</sup>                           | -6.72  | Asn181 | Pi-Sigma: Tyr444<br>Pi-Pi Stacked: Tyr407<br>Alkyl: Ile180<br>Pi-Alkyl: Phe208, Tyr407, FAD600, Ile180, Ile335                         | –                |
| hMAO-B                                     |        |        |                                                                                                                                        |                  |

---

|                                         |        |                   |                                                                                                                                                             |                             |
|-----------------------------------------|--------|-------------------|-------------------------------------------------------------------------------------------------------------------------------------------------------------|-----------------------------|
| Tanshinone I<br>(catalytic inhibitor)   | -9.87  | Cys172            | Pi-Sigma: Tyr435<br>Pi-Pi Stacked: Tyr398<br>Pi-Pi T-shaped: Tyr326<br>Alkyl: Leu171, Ile199<br>Pi-Alkyl: Tyr398, FAD600, Leu171, Cys172,<br>Ile198, Ile199 | –                           |
| Tanshinone I<br>(allosteric inhibitor)  | -7.5   | Arg172,<br>Thr196 | Pi-Sigma: Ile477, Thr479<br>Amide-Pi Stacked: Gly194, Thr195<br>Alkyl: Ile477<br>Pi-Alkyl: Arg120                                                           | Pi-Anion: Asp123,<br>Glu483 |
| Tanshinone IIA<br>(catalytic inhibitor) | -10.29 | Cys172            | Pi-Sigma: Leu171, Ile199<br>Alkyl: Ile199, Ile316, Pro104, Leu164, Leu171<br>Pi-Alkyl: Phe103, Trp119, Ile316, Ile199                                       | –                           |
| Tanshinone IIA<br>(inhibitor)           | -7.98  |                   | P-Pi Stacked: Phe103, Tyr112, Trp119<br>Alkyl: Trp119, Arg120, Val106<br>Pi-Alkyl: Phe103, Tyr112                                                           | Pi-Anion: Glu483            |

---

---

|                                           |       |        |                                                       |   |
|-------------------------------------------|-------|--------|-------------------------------------------------------|---|
| Cryptotanshinone<br>(catalytic inhibitor) | -9.89 | Tyr326 | Pi-Sigma: Leu171                                      |   |
|                                           |       |        | Pi-Pi T-shaped: Tyr326                                |   |
|                                           |       |        | Alkyl: Leu171, Cys172, Ile198, Leu164, Leu167, Ile316 | – |
|                                           |       |        | Pi-Alkyl: Tyr326, Tyr398, Ile199, Leu171              |   |
| Deprenyl <sup>d</sup>                     | -6.32 | Leu171 | Pi-Sigma: Leu171                                      |   |
|                                           |       |        | Pi-Pi T-shaped: Tyr326                                | – |
|                                           |       |        | Pi-Alkyl: Phe343, Tyr398, FAD600, Ile199              |   |

---

<sup>a</sup>Estimated free binding energy of the ligand–receptor complex. <sup>b</sup>The number of hydrogen bonds and all amino acid residues from the enzyme–inhibitor complex were determined with the AutoDock 4.2 program. <sup>c</sup>7-Methoxy-1-methyl-9H-pyrido [3,4-b]indole. <sup>d</sup>Reference ligand.

**Table S3.** Binding site residues and docking scores of tanshinone I and the reference ligands in human M<sub>4</sub> muscarinic acetylcholine receptor (hM<sub>4</sub>R).

| Ligand                                       | Binding Energy<br>(kcal/mol) <sup>a</sup> | Interacting residue <sup>b</sup> |                                                                                                                                |                                                                     |
|----------------------------------------------|-------------------------------------------|----------------------------------|--------------------------------------------------------------------------------------------------------------------------------|---------------------------------------------------------------------|
|                                              |                                           | H-bond                           | Hydrophobic                                                                                                                    | Electrostatic and others                                            |
| Tanshinone I                                 | -8.77                                     | –                                | Pi-Sigma: Tyr439, Tyr443<br>Pi-Pi stacked: Tyr113, Tyr439<br>Pi-Alkyl: Ala200, Ala203, Cys442<br>Alkyl: Ala200, Ala203, Cys442 | –                                                                   |
| Acetylcholine <sup>c</sup><br>(Agonist)      | -3.92                                     | Ser116                           | Pi-Sigma: Tyr439, Tyr433                                                                                                       | Attractive charge: Asp112<br>Pi-Cation: Tyr439                      |
| Tiotropium <sup>c</sup><br>(Inverse agonist) | -10.12                                    | Asn417                           | Pi-Sigma: Tyr439<br>Pi-Alkyl: Ala200, Val420, Ala203                                                                           | Attractive charge: Asp112<br>Pi-Cation: Tyr439<br>Pi-Sulfur: Trp164 |

<sup>a</sup>Estimated free binding energy of the ligand–receptor complex. <sup>b</sup>The number of hydrogen bonds and all amino acid residues from the enzyme–inhibitor complex were determined with the AutoDock 4.2 program. <sup>c</sup>Reference ligands.



#### References [in the main text]

33. Sur, C.; Mallorga, P.J.; Wittmann, M.; Jacobson, M.A.; Pascarella, D.; Williams, J.B.; Brandish, P.E.; Pettibone, D.J.; Scolnick, E.M.; Conn, P.J. N-desmethylozapine, an allosteric agonist at muscarinic 1 receptor, potentiates N-methyl-D-aspartate receptor activity. *Proc. Natl. Acad. Sci.* **2003**, *100*, 13674-13679.
34. Michal, P.; Lysíková, M.; Tuček, S. Dual effects of muscarinic M<sub>2</sub> acetylcholine receptors on the synthesis of cyclic AMP in CHO cells: dependence on time, receptor density and receptor agonists. *Br. J. Pharmacol.* **2001**, *132*, 1217-1228.
35. Olanas, M.C.; Onali, P. PD 102807, a novel muscarinic M<sub>4</sub> receptor antagonist, discriminates between striatal and cortical muscarinic receptors coupled to cyclic AMP. *Life Sci.* **1999**, *65*, 2233-2240.
36. Caulfield, M.P.; Birdsall, N.J. International Union of Pharmacology. XVII. Classification of muscarinic acetylcholine receptors. *Pharmacol. Rev.* **1998**, *50*, 279-290.
